# Supplementary material for: Yarrowia lipolytica Strains Engineered for the Production of Terpenoids
Source: PubMed Central journal article supplement (PMC7456906; doi:10.3389/fbioe.2020.00945), 2020-08-14
Supplement: Data_Sheet_1.pdf [file Data_Sheet_1.pdf]

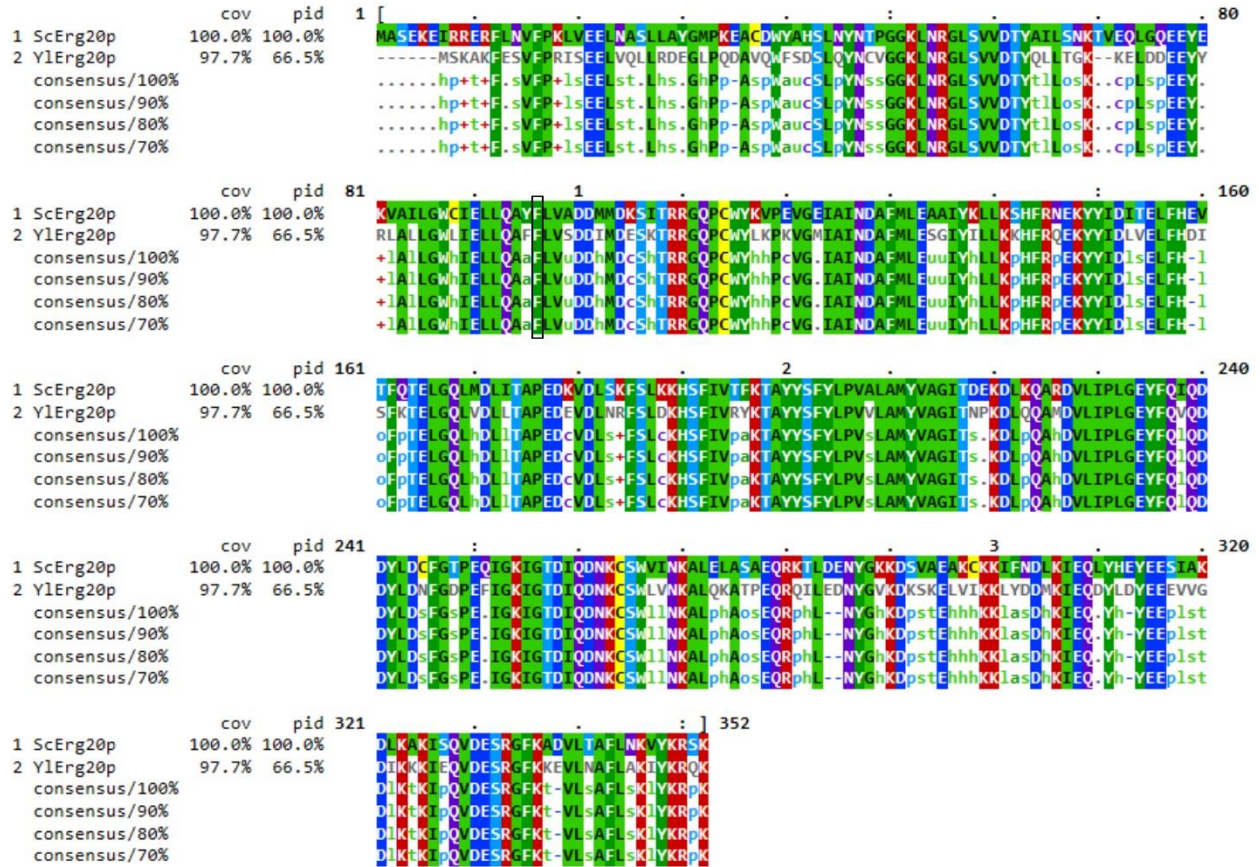

**Figure 1:** Alignment of *Y. lipolytica* Erg20p (YIERG20p. Accession number: XP\_503599.1) and *S. cerevisiae* Erg20p (ScERG20p. Accession number: CAA89462.1) amino sequences. The black box marks the phenylalanine residue in position 96 of ScERG20p and 88 of YIERG20p that was substituted for cysteine in the mutated version *Y. lipolytica* Erg20p<sup>F88C</sup>.

**Supplementary table 1.** Strains used in this study.

| Strain ID                      | Genotypes                                                                 | Parent strain | gRNA-vector | integration vector/biobrick | Reference                                                                                    |
|--------------------------------|---------------------------------------------------------------------------|---------------|-------------|-----------------------------|----------------------------------------------------------------------------------------------|
| ST3683                         | <i>mus51Δ, nugm-Htg2, ndh2i, lys11-, leu2-, ura3-, MatB</i>               |               |             |                             | (Angerer et al., 2014)<br><i>Y. lipolytica</i> GB20 was a kind gift from Volker Zickermann.  |
| ST4842                         | MATa                                                                      |               |             |                             | <i>Y. lipolytica</i> W29 (MATa, ATCC©20460TM) strain Y-63746 from the ARS culture collection |
| ST6512                         | MATa ku70Δ::PrTEF1->Cas9-TTef12::PrGPD->DsdA-TLip2                        | ST4842        |             | pCfB6364                    | (Marella et al., 2019)                                                                       |
| <b>β-farnesene test strain</b> |                                                                           |               |             |                             |                                                                                              |
| ST8979                         | MATa ku70Δ::PrTEF1->Cas9-TTef12::PrGPD->DsdA-TLip2 IntE_1-PrTefInt->AaBFS | ST6512        | pCfB6633    | pCfB8829                    | This study                                                                                   |
| ST8998                         | MATa ku70Δ::PrTEF1->Cas9-TTef12::PrGPD->DsdA-TLip2                        | ST8979        | pCfB8855    | pCfB8822                    | This study                                                                                   |

|                                      |                                                                                                                                                                                                    |        |          |          |            |
|--------------------------------------|----------------------------------------------------------------------------------------------------------------------------------------------------------------------------------------------------|--------|----------|----------|------------|
|                                      | IntE_1-PrTefInt->AaBFS IntC_2-HMG1<-PrGPD-PrTefInt->ERG12                                                                                                                                          |        |          |          |            |
| ST9006                               | MATa ku70Δ::PrTEF1->Cas9-TTef12::PrGPD->DsdA-TLip2 IntE_1-PrTefInt->AaBFS IntC_2-HMG1<-PrGPD-PrTefInt->ERG12 IntD_1-IDII<-PrGPD-PrTefInt->ERG20                                                    | ST8998 | pCfB6631 | pCfB8878 | This study |
| ST9026                               | MATa ku70Δ::PrTEF1->Cas9-TTef12::PrGPD->DsdA-TLip2 IntE_1-PrTefInt->AaBFS IntC_2-HMG1<-PrGPD-PrTefInt->ERG12 IntD_1-IDII<-PrGPD-PrTefInt->ERG20 IntC_3-SeACS<-PrGPD-PrTefInt->YIACL1               | ST9006 | pCfB8856 | pCfB8823 | This study |
| ST9147                               | MATa ku70Δ::PrTEF1->Cas9-TTef12::PrGPD->DsdA-TLip2 IntE_1-PrTefInt->AaBFS IntC_2-HMG1<-PrGPD-PrTefInt->ERG12 IntD_1-IDII<-PrGPD-PrTefInt->ERG20 IntC_3-SeACS<-PrGPD-PrTefInt->YIACL1 pERG11::pSQS1 | ST9026 | pCfB8978 | BB4010   | This study |
| <b>Sesquiterpene platform strain</b> |                                                                                                                                                                                                    |        |          |          |            |
| ST8980                               | MATa ku70Δ::PrTEF1->Cas9-TTef12::PrGPD->DsdA-TLip2 IntC_2-HMG1<-PrGPD-PrTefInt->ERG12                                                                                                              | ST6512 | pCfB6627 | pCfB8822 | This study |
| ST9027                               | MATa ku70Δ::PrTEF1->Cas9-TTef12::PrGPD->DsdA-TLip2 IntC_2-HMG1<-PrGPD-PrTefInt->ERG12 IntC_3-SeACS<-PrGPD-PrTefInt->YIACL1                                                                         | ST8980 | pCfB8856 | pCfB8823 | This study |
| ST9100                               | MATa ku70Δ::PrTEF1->Cas9-TTef12::PrGPD->DsdA-TLip2 IntC_2-HMG1<-PrGPD-PrTefInt->ERG12 IntC_3-SeACS<-PrGPD-PrTefInt->YIACL1 IntD_1-IDII<-PrGPD-PrTefInt->ERG20                                      | ST9027 | pCfB6631 | pCfB8878 | This study |
| ST9149                               | MATa ku70Δ::PrTEF1->Cas9-TTef12::PrGPD->DsdA-TLip2 IntC_2-HMG1<-PrGPD-PrTefInt->ERG12 IntC_3-SeACS<-PrGPD-PrTefInt->YIACL1 IntD_1-IDII<-PrGPD-PrTefInt->ERG20 pERG11::pSQS1                        | ST9100 | pCfB8979 | BB4010   | This study |
| ST9204                               | MATa ku70Δ::PrTEF1->Cas9-TTef12::PrGPD->DsdA-TLip2 IntC_2-HMG1<-PrGPD-PrTefInt->ERG12 IntC_3-SeACS<-PrGPD-PrTefInt->YIACL1 IntD_1-IDII<-PrGPD-PrTefInt->ERG20 pERG11::pSQS1 IntE_1-PrTefInt->CnVS  | ST9149 | pCfB6633 | pCfB8830 | This study |
| ST9396                               | MATa ku70Δ::PrTEF1->Cas9-TTef12::PrGPD->DsdA-TLip2 IntE_1-PrTefInt->CnVS                                                                                                                           | ST6512 | pCfB6633 | pCfB8830 | This study |
| <b>Monoterpene platform strain</b>   |                                                                                                                                                                                                    |        |          |          |            |
| ST9148                               | MATa ku70Δ::PrTEF1->Cas9-TTef12::PrGPD->DsdA-TLip2 IntC_2-HMG1<-PrGPD-PrTefInt-                                                                                                                    | ST9027 | pCfB8978 | BB4010   | This study |

|                                   |                                                                                                                                                                                                               |        |          |          |            |
|-----------------------------------|---------------------------------------------------------------------------------------------------------------------------------------------------------------------------------------------------------------|--------|----------|----------|------------|
|                                   | >ERG12 IntC_3-SeACS<-PrGPD-PrTefInt->YIACL1 pERG11::pSQS1                                                                                                                                                     |        |          |          |            |
| ST9202                            | MATa ku70Δ::PrTEF1->Cas9-TTef12::PrGPD->DsdA-TLip2 IntC_2-HMG1<-PrGPD-PrTefInt->ERG12 IntC_3-SeACS<-PrGPD-PrTefInt->YIACL1 pERG11::pSQS1 IntD_1-IDI1<-PrGPD-PrTefInt->ERG20(F88W-N119W)                       | ST9148 | pCfB8857 | pCfB8824 | This study |
| ST9249                            | MATa ku70Δ::PrTEF1->Cas9-TTef12::PrGPD->DsdA-TLip2 IntC_2-HMG1<-PrGPD-PrTefInt->ERG12 IntC_3-SeACS<-PrGPD-PrTefInt->YIACL1 pERG11::pSQS1 IntD_1-IDI1<-PrGPD-PrTefInt->ERG20(F88W-N119W) IntE_1-PrTefInt->CILS | ST9202 | pCfB6633 | pCfB8827 | This study |
| ST9250                            | MATa ku70Δ::PrTEF1->Cas9-TTef12::PrGPD->DsdA-TLip2 IntC_2-HMG1<-PrGPD-PrTefInt->ERG12 IntC_3-SeACS<-PrGPD-PrTefInt->YIACL1 pERG11::pSQS1 IntD_1-IDI1<-PrGPD-PrTefInt->ERG20(F88W-N119W) IntE_1-PrTefInt->PFLS | ST9202 | pCfB6633 | pCfB8828 | This study |
| ST9394                            | MATa ku70Δ::PrTEF1->Cas9-TTef12::PrGPD->DsdA-TLip2 IntE_1-PrTefInt->CILS                                                                                                                                      | ST6512 | pCfB6633 | pCfB8827 | This study |
| ST9395                            | MATa ku70Δ::PrTEF1->Cas9-TTef12::PrGPD->DsdA-TLip2 IntE_1-PrTefInt->PFLS                                                                                                                                      | ST6512 | pCfB6633 | pCfB8828 | This study |
| <b>Triterpene platform strain</b> |                                                                                                                                                                                                               |        |          |          |            |
| ST9009                            | MATa ku70Δ::PrTEF1->Cas9-TTef12::PrGPD->DsdA-TLip2 IntC_2-HMG1<-PrGPD-PrTefInt->ERG12 pERG7_100bp                                                                                                             | ST8980 | pCfB8880 | BB3895   | This study |
| ST9010                            | MATa ku70Δ::PrTEF1->Cas9-TTef12::PrGPD->DsdA-TLip2 IntC_2-HMG1<-PrGPD-PrTefInt->ERG12 pERG7_50bp                                                                                                              | ST8980 | pCfB8880 | BB3952   | This study |
| ST9029                            | MATa ku70Δ::PrTEF1->Cas9-TTef12::PrGPD->DsdA-TLip2 IntC_2-HMG1<-PrGPD-PrTefInt->ERG12 pERG7_50bp IntC_3-SeACS<-PrGPD-PrTefInt->YIACL1                                                                         | ST9010 | pCfB6630 | pCfB8823 | This study |
| ST9044                            | MATa ku70Δ::PrTEF1->Cas9-TTef12::PrGPD->DsdA-TLip2 IntC_2-HMG1<-PrGPD-PrTefInt->ERG12 pERG7_50bp IntC_3-SeACS<-PrGPD-PrTefInt->YIACL1 IntD_1-IDI1<-PrGPD-PrTefInt->ERG20                                      | ST9029 | pCfB8857 | pCfB8878 | This study |
| ST9105                            | MATa ku70Δ::PrTEF1->Cas9-TTef12::PrGPD->DsdA-TLip2 IntC_2-HMG1<-PrGPD-PrTefInt->ERG12 pERG7_50bp IntC_3-SeACS<-PrGPD-PrTefInt->YIACL1 IntD_1-IDI1<-PrGPD-PrTefInt->ERG20 IntE_1-PrTefInt->SQS1                | ST9044 | pCfB6633 | pCfB8832 | This study |
| ST9106                            | MATa ku70Δ::PrTEF1->Cas9-TTef12::PrGPD->DsdA-TLip2                                                                                                                                                            | ST9044 | pCfB6633 | pCfB8831 | This study |

|                                                  |                                                                                                                                                                                                                          |        |          |          |            |
|--------------------------------------------------|--------------------------------------------------------------------------------------------------------------------------------------------------------------------------------------------------------------------------|--------|----------|----------|------------|
|                                                  | IntC_2-HMG1<-PrGPD-PrTefInt->ERG12 pERG7_50bp IntC_3-SeACS<-PrGPD-PrTefInt->YIACL1 IntD_1-IDII<-PrGPD-PrTefInt->ERG20 IntE_1-SQE<-PrGPD-PrTefInt->SQS1                                                                   |        |          |          |            |
| ST9257                                           | MATa ku70Δ::PrTEF1->Cas9-TTef12::PrGPD->DsdA-TLip2 IntC_2-HMG1<-PrGPD-PrTefInt->ERG12 pERG7_50bp IntC_3-SeACS<-PrGPD-PrTefInt->YIACL1 IntD_1-IDII<-PrGPD-PrTefInt->ERG20 IntE_1-PrTefInt->SQS1 IntE_3-PrTefInt->DGA1     | ST9105 | pCfB8860 | pCfB8837 | This study |
| <b>Diterpene and carotenoid platform strains</b> |                                                                                                                                                                                                                          |        |          |          |            |
| ST9102                                           | MATa ku70Δ::PrTEF1->Cas9-TTef12::PrGPD->DsdA-TLip2 IntC_2-HMG1<-PrGPD-PrTefInt->ERG12 IntC_3-SeACS<-PrGPD-PrTefInt->YIACL1 IntD_1-IDII<-PrGPD-PrTefInt->GGS1                                                             | ST9027 | pCfB6631 | pCfB8826 | This study |
| ST9148                                           | MATa ku70Δ::PrTEF1->Cas9-TTef12::PrGPD->DsdA-TLip2 IntC_2-HMG1<-PrGPD-PrTefInt->ERG12 IntC_3-SeACS<-PrGPD-PrTefInt->YIACL1 pERG11::pSQS1                                                                                 | ST9027 | pCfB8978 | BB4010   | This study |
| ST9150                                           | MATa ku70Δ::PrTEF1->Cas9-TTef12::PrGPD->DsdA-TLip2 IntC_2-HMG1<-PrGPD-PrTefInt->ERG12 IntC_3-SeACS<-PrGPD-PrTefInt->YIACL1 IntD_1-IDII<-PrGPD-PrTefInt->GGS1 pERG11::pSQS1                                               | ST9102 | pCfB8979 | BB4010   | This study |
| ST9203                                           | MATa ku70Δ::PrTEF1->Cas9-TTef12::PrGPD->DsdA-TLip2 IntC_2-HMG1<-PrGPD-PrTefInt->ERG12 IntC_3-SeACS<-PrGPD-PrTefInt->YIACL1 pERG11::pSQS1 IntD_1-IDII<-PrGPD-PrTefInt->ERG20(F96C)                                        | ST9148 | pCfB8857 | pCfB8825 | This study |
| ST9251                                           | MATa ku70Δ::PrTEF1->Cas9-TTef12::PrGPD->DsdA-TLip2 IntC_2-HMG1<-PrGPD-PrTefInt->ERG12 IntC_3-SeACS<-PrGPD-PrTefInt->YIACL1 pERG11::pSQS1 IntD_1-IDII<-PrGPD-PrTefInt->ERG20(F96C) IntE_1-XdCtrl<-PrGPD-PrTefInt->XdCtrYB | ST9203 | pCfB6633 | pCfB8833 | This study |
| ST9253                                           | MATa ku70Δ::PrTEF1->Cas9-TTef12::PrGPD->DsdA-TLip2 IntC_2-HMG1<-PrGPD-PrTefInt->ERG12 IntC_3-SeACS<-PrGPD-PrTefInt->YIACL1 IntD_1-IDII<-PrGPD-PrTefInt->GGS1 pERG11::pSQS1 IntE_1-XdCtrl<-PrGPD-PrTefInt->XdCtrYB        | ST9150 | pCfB6633 | pCfB8833 | This study |

**Supplementary table 2.** Vectors used in this study.

| Vector Name                    | Parent vector | Biobricks | References                 |
|--------------------------------|---------------|-----------|----------------------------|
| pBP8009 (pIntF_3-TPex20-TLip2) |               |           | (Holkenbrink et al., 2018) |

|                                                            |                |                        |                           |
|------------------------------------------------------------|----------------|------------------------|---------------------------|
| pCfB3405 (pORI1001-Nat-CEN1-USER)                          |                |                        | (Holkenbrink et al. 2018) |
| pCfB5119 (pIntB-HphMx-YIHMG1<-PrGPD-PrFBA1->YIGGS1)        |                |                        | (Kildegaard et al., 2017) |
| pCfB5141 (pIntE-1-NatMx-XdCrtI<-PrGPD-PrFBA1->XdCrtYB)     |                |                        | (Kildegaard et al., 2017) |
| pCfB6364 (ku70Δ::SpCas9-EcDsdAMX4)                         |                |                        | (Marella et al., 2019)    |
| pCfB6371 (pIntC_3-TPex20-TLip2)                            |                |                        | (Holkenbrink et al. 2018) |
| pCfB6601 (pIntE-4-Hph-PrExp->PflS)                         |                |                        | Unpublished               |
| pCfB6602 (pIntE-4-Hph-PrExp->CILS)                         |                |                        | Unpublished               |
| pCfB6605 (pIntE-4-Hph-PrExp->YISQS1)                       |                |                        | Unpublished               |
| pCfB6606 (pIntE-4-Hph-CnVS<-PrEXP)                         |                |                        | Unpublished               |
| pCfB6620 (pORI1001-Nat-CEN1-USER-IDI1<-PrEXP-PrGPD->ERG20) |                |                        | Unpublished               |
| pCfB6677 (pIntE_1-TPex20-TLip2)                            |                |                        | (Holkenbrink et al. 2018) |
| pCfB6679 (pIntE_4-TPex20-TLip2)                            |                |                        | (Holkenbrink et al. 2018) |
| pCfB6681 (pIntE_3-TPex20-TLip2)                            |                |                        | (Holkenbrink et al. 2018) |
| pCfB6682 (pIntC_2-TPex20-TLip2)                            |                |                        | (Holkenbrink et al. 2018) |
| pCfB6684 (pIntD_1-TPex20-TLip2)                            |                |                        | (Holkenbrink et al. 2018) |
| pCfB6799 (pIntE-4-Hph-BFS_M13<-PrEXP)                      |                |                        | Unpublished               |
| pCfB7063 (prDNA-Ura3d1-TPex20+PTEfintron+CrtW+TLip2)       |                |                        | (Kildegaard et al., 2017) |
| pCFB8843 (pORI1001-Hyg-CEN1-USER)                          | BB3924, BB3925 |                        | This study                |
| <b>Integration vectors</b>                                 |                |                        |                           |
| pCfB8822 (IntC_2-HMG1<-PrGPD-PrTefInt->ERG12)              | pCfB6682       | BB3865, BB3866, BB3867 | This study                |
| pCfB8823 (IntC_3-SeACS<-PrGPD-PrTefInt->YIACL1)            | pCfB6371       | BB3865, BB3868, BB3869 | This study                |
| pCfB8824 (IntD_1-IDI1<-PrGPD-PrTefInt->ERG20(F88W-N119W))  | pCfB6684       | BB3865, BB3870, BB3874 | This study                |
| pCfB8825 (IntD_1-IDI1<-PrGPD-PrTefInt->ERG20(F96C))        | pCfB6684       | BB3865, BB3870, BB3877 | This study                |
| pCfB8826 (IntD_1-IDI1<-PrGPD-PrTefInt->GGS1)               | pCfB6684       | BB3865, BB3870, BB3878 | This study                |
| pCfB8827 (IntE_1-PrTefInt->CILS)                           | pCfB6677       | BB3879, BB3880         | This study                |
| pCfB8828 (IntE_1-PrTefInt->PflS)                           | pCfB6677       | BB3879, BB3881         | This study                |
| pCfB8829 (IntE_1-PrTefInt->AaBFS)                          | pCfB6677       | BB3879, BB3882         | This study                |
| pCfB8830 (IntE_1-PrTefInt->CnVS)                           | pCfB6677       | BB3879, BB3883         | This study                |
| pCfB8831 (IntE_1-SQE<-PrGPD-PrTefInt->SQS1)                | pCfB6677       | BB3865, BB3884, BB3885 | This study                |
| pCfB8832 (IntE_1-PrTefInt->SQS1)                           | pCfB6677       | BB3879, BB3885         | This study                |
| pCfB8833 (IntE_1-XdCrtI<-PrGPD-PrTefInt->XdCrtYB)          | pCfB6677       | BB3865, BB3886, BB3887 | This study                |
| pCfB8837 (IntE_3-PrTefInt->DGA1)                           | pCfB6681       | BB3879, BB3898         | This study                |
| pCfB8878 (IntD_1-IDI1<-PrGPD-PrTefInt->ERG20)              | pCfB6684       | BB3865, BB3870, BB3871 | This study                |
| <b>gRNA-vectors</b>                                        |                |                        |                           |
| pCfB6627 (pNat-YLgRNA2_IntC_2)                             |                |                        | (Holkenbrink et al. 2018) |
| pCfB6630 (pNat-YLgRNA3_IntC_3)                             |                |                        | (Holkenbrink et al. 2018) |
| pCfB6631 (pNat-YLgRNA2_IntD_1)                             |                |                        | (Holkenbrink et al. 2018) |
| pCfB6633 (pNat-YLgRNA2_IntE_1)                             |                |                        | (Holkenbrink et al. 2018) |

|                                       |          |                                    |                           |
|---------------------------------------|----------|------------------------------------|---------------------------|
| pCfB6637 (pNat-YLgRNA3_IntE_3)        |          |                                    | (Holkenbrink et al. 2018) |
| pCfB6638 (pNat-YLgRNA2_IntE_4):       |          |                                    | (Holkenbrink et al. 2018) |
| pCfB8855 (pHphM-YLgRNA2_IntC_2)       | pCFB8843 | BB3926                             | This study                |
| pCfB8856 (pHphM-YLgRNA2_IntC_3)       | pCFB8843 | BB3927                             | This study                |
| pCfB8857 (pHphM-YLgRNA2_IntD_1)       | pCFB8843 | BB3928                             | This study                |
| pCfB8858 (pHphM-YLgRNA2_IntE_1)       | pCFB8843 | BB3929                             | This study                |
| pCfB8880 (pERG7_gRNA_KO_Hyg)          | pCFB8843 | BB1635, BB1636, PR-24059, PR-24060 | This study                |
| pCfB8978 (pSQS1_replacement_gRNA_Nat) | pCfB3405 | BB1635, BB1636, PR-24587, PR-24588 | This study                |
| pCfB8979 (pSQS1_replacement_gRNA_Hyg) | pCFB8843 | BB1635, BB1636, PR-24587, PR-24588 | This study                |
| <b>Synthetic genes</b>                |          |                                    |                           |
| pCfB8820 (SeACS)                      |          |                                    | This study                |

**Supplementary table 3.** Biobricks used in this study.

| Biobrick Name                   | Template       | Forward primer | Reverse primer | Reference                 |
|---------------------------------|----------------|----------------|----------------|---------------------------|
| BB1635                          |                |                |                | (Holkenbrink et al. 2018) |
| BB1636                          |                |                |                | (Holkenbrink et al. 2018) |
| BB3863 (Tefint(PrGDPfusion)->)  | pCfB7063       | 24013          | 18214          | This study                |
| BB3864 (<-PrGDP)                | pCfB5119       | 15528          | 15529          | This study                |
| BB3865 (<-PrGDP_Tefint->)       | BB3863, BB3864 | 15528          | 18214          | This study                |
| BB3866 (<-HMG1)                 | pCfB5119       | 23753          | 23752          | This study                |
| BB3867 (ERG12->)                | ST3683 gDNA    | 24014          | 24015          | This study                |
| BB3868 (<-YIOpSeACS)            | pCfB8820       | 24016          | 24017          | This study                |
| BB3869 (YIACL1->)               | ST3683 gDNA    | 24018          | 24019          | This study                |
| BB3870 (<-IDI1)                 | ST3683 gDNA    | 24020          | 24021          | This study                |
| BB3871 (ERG20->)                | pCfB6620       | 24022          | 24023          | This study                |
| BB3871 (ERG20->)                | pCfB6620       | 24022          | 24023          | This study                |
| BB3872 (ERG20(F88W-N119W)_up)   | pCfB6620       | 24022          | 24026          | This study                |
| BB3873 (ERG20(F88W-N119W)_down) | pCfB6620       | 24027          | 24023          | This study                |
| BB3874 (ERG20(F88W-N119W)->)    | BB3872, BB3873 | 24022          | 24023          | This study                |
| BB3875 (ERG20(F88C)_up)         | pCfB6620       | 24022          | 24024          | This study                |
| BB3876 (ERG20(F88C)_down)       | pCfB6620       | 24025          | 24023          | This study                |
| BB3877 (ERG20(F88C)->)          | BB3875, BB3876 | 24022          | 24023          | This study                |
| BB3878 (GGS1->)                 | pCfB5119       | 24028          | 24029          | This study                |
| BB3879 (Tefint->)               | pCfB7063       | 23847          | 18214          | This study                |
| BB3880 (CILS->)                 | pCfB6602       | 24030          | 24031          | This study                |
| BB3881 (PFLS->)                 | pCfB6601       | 24032          | 24033          | This study                |
| BB3882 (AaBFS->)                | pCfB6799       | 24061          | 24062          | This study                |
| BB3883 (CnVS->)                 | pCfB6606       | 24034          | 24035          | This study                |
| BB3884 (<-SQE)                  | ST3683 gDNA    | 24038          | 24039          | This study                |
| BB3885 (SQS1->)                 | pCfB6605       | 24036          | 24037          | This study                |

|                                             |                           |       |       |            |
|---------------------------------------------|---------------------------|-------|-------|------------|
| BB3886 (<-XdCtrl)                           | pCfB5141                  | 24044 | 24045 | This study |
| BB3887 (XdCtrYB->)                          | pCfB5141                  | 24046 | 24047 | This study |
| BB3890 (pSQS_50bp_up)                       | ST3683 gDNA               | 24048 | 24049 | This study |
| BB3891 (pSQS_50bp_down)                     | ST3683 gDNA               | 17760 | 24050 | This study |
| BB3893 (pERG7_100bp_up)                     | ST3683 gDNA               | 24055 | 24056 | This study |
| BB3894 (pERG7_100bp_down)                   | ST3683 gDNA               | 24057 | 24058 | This study |
| BB3895 (pERG7_100bp_repair)                 | BB3893, BB3894            | 24055 | 24058 | This study |
| BB3898 (DGA1_YALI0E32769g->)                | ST3683 gDNA               | 24365 | 24070 | This study |
| BB3924 (Episomal vector backbone w/o HphMX) | pCFB3405                  | 23934 | 10593 | This study |
| BB3925 (HphMX-TTef1 insert)                 | pCfB6605                  | 23935 | 23936 | This study |
| BB3926 (gRNA-cassette for IntC_2)           | pCFB6627                  | 10607 | 10604 | This study |
| BB3927 (gRNA-cassette for IntC_3)           | pCfB6630                  | 10607 | 10604 | This study |
| BB3928 (gRNA-cassette for IntD_1)           | pCfB6631                  | 10607 | 10604 | This study |
| BB3929 (gRNA-cassette for IntE_1)           | pCfB6633                  | 10607 | 10604 | This study |
| BB3944 (pERG7_50bp_up)                      | ST3683 gDNA               | 24055 | 24366 | This study |
| BB3952 (pERG7_50bp_repair)                  | BB3944, BB3894            | 24055 | 24058 | This study |
| BB4007 (SQS_UP_promoter_replacement)        | ST3683 gDNA               | 24581 | 24582 | This study |
| BB4008 (pERG11)                             | ST3683 gDNA               | 24583 | 24584 | This study |
| BB4009 (SQS_DOWN_promoter_replacement)      | ST3683 gDNA               | 24585 | 24586 | This study |
| BB4010 (SQS_UP_pERG11_pSQS_DOWN)            | BB4007, BB4008,<br>BB4009 | 24581 | 24586 | This study |

**Supplementary table 4.** Primers used in this study.

| Primer Name | Sequence (5'->3')                          |
|-------------|--------------------------------------------|
| PR-10593    | AGCAGGCTUGGAGGCGACGTGGCAG                  |
| PR-10604    | CACGCGAUACCGTACCCACACAAAAAAGCACCACCGACTC   |
| PR-10607    | CGTGCGAUAGTGAATCATTGCTAACAGATC             |
| PR-15528    | ATGACAGAUTGTTGATGTGTGTTTAATCAAGAATG        |
| PR-15529    | AGTACTGAUGACGCAGTAGGATGTCCTGCACGG          |
| PR-17760    | AGTGGCCUATTAGCAACACGATCTACC                |
| PR-18214    | AGTACTGCAAAAAGUGCTG                        |
| PR-18214    | AGTACTGCAAAAAGUGCTG                        |
| PR-23752    | ATCTGTCAUGCCACAATGCTACAAGCAGCTATTGG        |
| PR-23753    | CACGCGAUCTATGACCGTATGCAAATATTCC            |
| PR-23847    | CGTGCGAUAGAGACCGGGTTGGCGGCGCAT             |
| PR-23934    | ACCCATTGCTGUAGATATGTCTTGTGTGTAAGGGGG       |
| PR-23935    | ACAGCAATGGGUAAAAAGCCTGAACTCACCGC           |
| PR-23936    | AAGCCTGCUGAATTCGGACACGGGCAT                |
| PR-24013    | ATCAGTAGCUAGAGACCGGGTTGGCGGCC              |
| PR-24014    | ACTTTTTCAGTACUAACCGCAGGACTACATCATTTCGGCGCC |
| PR-24015    | CACGCGAUCTAATGGGTCCAGGGACCG                |
| PR-24016    | CGTGCGAUTTAAGAGGGCATAGCAATGGCC             |

|          |                                                              |
|----------|--------------------------------------------------------------|
| PR-24017 | ATCTGTCAUGCCACAATGTCTCAGACCCACAAGCACG                        |
| PR-24018 | ACTTTTTGCAGTACUAACCGCAGTCAGCGAAATCCATTACGAG                  |
| PR-24019 | CACGCGAUTTAAACTCCGAGAGGAGTGGAA                               |
| PR-24020 | CGTGCGAUCTACTTGATCCACCGCCGAA                                 |
| PR-24021 | ATCTGTCAUGCCACAATGACGACGTCTTACAGCGA                          |
| PR-24022 | ACTTTTTGCAGTACUAACCGCAGTCCAAGGCGAAATTCGAAAAGC                |
| PR-24023 | CACGCGAUCTACTTCTGTGCTTGTAATCTT                               |
| PR-24024 | AGGCAAAACGCCUGCAGCAGCTCAATCAGCCA                             |
| PR-24025 | AGGCGTTTTGCCUCGTGTCGGACGACATTATGG                            |
| PR-24026 | AGGGCTGGCCTCGTCGGGUCTTGGACTCATCCATAATGTCGTCCGACACGAGCCA      |
| PR-24027 | ACCCGACGAGGCCAGCCCUGCTGGTACCTCAAGCCCAAGGTCGGCATGATTGCCATCTGG |
| PR-24028 | ACTTTTTGCAGTACUAACCGCAGGATTATAACAGCGCGGATTTC                 |
| PR-24029 | CACGCGAUTCACCTGCGCATCCTCAAAG                                 |
| PR-24030 | ACTTTTTGCAGTACUAACCGCAGTCCTCTTGCATCAACCCCTC                  |
| PR-24031 | CACGCGAUTTAGCCCTTGGTGCCGGG                                   |
| PR-24032 | ACTTTTTGCAGTACUAACCGCAGCACATGGCTATCCCCATCAAG                 |
| PR-24033 | CACGCGAUTTACAGCCACTGCTCGAACA                                 |
| PR-24034 | ACTTTTTGCAGTACUAACCGCAGGCCGAGATGTTCAACGGCA                   |
| PR-24035 | CACGCGAUTTAGGGAATGATGGGCTCGAC                                |
| PR-24036 | ACTTTTTGCAGTACUAACCGCAGGGAAAACATCGAACTGCTCTT                 |
| PR-24037 | CACGCGAUCTAATCTCTCAGAGGAAACATCTT                             |
| PR-24038 | CGTGCGAUCTAAGTCAGCTCGCTCCAAATG                               |
| PR-24039 | ATCTGTCAUGCCACAATGGTCACCCAACAGTCTGC                          |
| PR-24044 | CGTGCGAUTCAGAAAGCAAGAACACCAACG                               |
| PR-24045 | ATCTGTCAUGCCACAATGGGAAAAGAACAAGATCAGGA                       |
| PR-24046 | ACTTTTTGCAGTACUAACCGCAGATGACGGCTCTCGCATATTAC                 |
| PR-24047 | CACGCGAUTCACCTGCCCTTCCCATCCGC                                |
| PR-24048 | TCCCATTCTGTGCGTAATGTGCG                                      |
| PR-24049 | AGGCCACUGGACACAACTCGCTTGTT                                   |
| PR-24050 | AGAGTTGTGTCTCGTGTGG                                          |
| PR-24055 | GGATCTCGTTGCCGCCAAAG                                         |
| PR-24056 | ACTCTGTGTAUCGTCTTTTATCCACACTTCAAAT                           |
| PR-24057 | ATACGACAGAGUTCCAAAAATGGCCAGATCGAT                            |
| PR-24058 | TATACTCTGGCGGTCGCATG                                         |
| PR-24059 | GACATGCGACAATAAGACATTTTAGAGCT                                |
| PR-24060 | TGTCTTAGTTGTGCGCATGTCTAACCAACCT                              |
| PR-24061 | ACTTTTTGCAGTACUAACCGCAGTCTACCCTGCCTATCTCTTCT                 |
| PR-24062 | CACGCGAUTCACACCACCATGGGGTGC                                  |
| PR-24070 | CACGCGAUTCACCAATCATTGGAACCTCTG                               |
| PR-24365 | ACTTTTTGCAGTACUAACCGCAGACTATCGACTCACAATACTACA                |
| PR-24366 | ACTCTGTGTAUAGTATATAGCACCCTCCACC                              |
| PR-24581 | CCTCGCTCATTTACTAAGCA                                         |



|          |                                   |
|----------|-----------------------------------|
| PR-24582 | ACGTCGTGAAAUATCGACGTGGGGATAATTGAA |
| PR-24583 | ATTTACGACGUAATCATATGCACTGGCAAATCT |
| PR-24584 | AGTTTTCCCATGUTGTGGTCGACTTGAGTGAGA |
| PR-24585 | ACATGGGAAAACUCATCGAACTGCTCTTGAC   |
| PR-24586 | GCAACACGTCGGTTCCAAA               |
| PR-24587 | AACTTCAGAACAATTCGAGGGTTTTAGAGCT   |
| PR-24588 | CCTCGAATTGTTCTGAAGTTTAACCAACCT    |

**Synthetic genes used in this study.**

>SeACS

ATGTCTCAGACCCACAAGCACGCTATCCCCGCCAACATTGCCGACCGATGCCTGATC  
AACCCCGAGCAGTACGAGACTAAGTACAAGCAGTCTATCAACGACCCCGACACCTT  
CTGGGGCGAGCAGGGCAAGATCCTGGACTGGATCACCCCTTACCAGAAGGTCAAGA  
ACACCTCTTTTCGCTCCCGGCAACGTGTCTATCAAGTGGTACGAGGACGGCACCCCTGA  
ACCTGGCCGCCAACTGCCTGGACCGACACCTCCAAGAGAACGGCGACCGAACCGCC  
ATCATCTGGGAGGGCGACGACACCTCTCAGTCTAAGCACATCTCTTACCAGAGCTG  
CACCGAGATGTGTGCCGATTTCGCTAACACCCTGCTGGACCTGGGCATCAAGAAGGG  
CGACGTCGTCGCTATCTACATGCCATGGTGCCCGAGGCCGCCGTGGCCATGCTGGC  
CTGCGCTCGAATCGGCGCCGTGCACTCTGTGATCTTCGGCGGCTTCTCGCCCGAGGC  
TGTGGCCGGACGAATCATCGACTCCTCTTCTCGACTGGTGATTACCGCCGACGAGGG  
CGTGCGAGCCGGCCGATCTATTCCTGAAGAAGAACGTCGACGACGCTCTGAAGA  
ACCCCAACGTGACCTCTGTGAGCACGTGATCGTGCTGAAGCGAACCGGCTCTGAC  
ATCGACTGGCAAGAGGGCCGAGATCTGTGGTGGCGAGATCTGATCGAGAAGGCTTC  
TCCCGAGCACCAGCCTGAGGCCATGAACGCTGAGGACCCTCTGTTTCATCCTGTACAC  
CTCTGGCTCTACCGGCAAGCCCAAGGGCGTGCTGCACACCACCGGCGGCTACCTGGT  
GTACGCCGCCACCACCTTCAAGTACGTGTTTCGACTACCATCCTGGCGACATCTACTG  
GTGCACCGCTGACGTCGGCTGGGTGACCGGCCACTCTTACCTGCTGTACGGACCCCT  
GGCCTGTGGCGCTACCACTCTGATGTTTCGAGGGCGTCCCCAACTGGCCCACTCCTGC  
TCGAATGTGCCAGGTGGTGGACAAGCACCAGGTGAACATTCTGTACACCGCTCCTAC  
CGCCATTCGAGCCCTGATGGCCGAGGGCGACAAGGCCATCGAGGGCACCGACCGAT  
CTTCTCTGCGAATCCTGGGCTCTGTGGGCGAGCCTATTAACCCCGAGGCCTGGGAGT  
GGTACTGGAAGAAGATTGGCAAGGAAAAGTGCCCCGTCGTTGACACCTGGTGGCAG  
ACCGAGACTGGCGGCTTCATGATTACCCCTCTGCCTGGCGCCATCGAGCTGAAGGCC  
GGCTCTGCTACCCGACCATCTTTCGGCGTGACGCCCGCTCTGGTTCGACAACGAGGGA  
CACCCCTCAAGAGGGCGCCACCGAGGGCAACCTGGTCATCACCGACTCTTGGCCCGG  
ACAGGCTCGAACCCCTGTTTCGGCGACCACGAGCGATTTGAGCAGACCTACTTCTCTAC  
CTTCAAGAACATGTACTTCTCTGGCGACGGCGCTCGACGAGATGAGGACGGCTACTA  
CTGGATTACCGGCCGAGTGGACGACGTGCTGAACGTGTCTGGCCACCGACTGGGCA  
CCGCCGAGATCGAGTCTGCCCTGGTGGCTCACCCCAAGATCGCCGAGGCTGCCGTCG  
TGGGCATTCCCCACGCCATCAAGGGCCAAGCCATCTACGCCTACGTGACCCTCAACC  
ACGGCGAGGAACCCTCGCCTGAGCTGTACGCCGAGGTGCGAAACTGGGTGCGAAAG  
GAAATCGGTCCCCTGGCTACCCCTGACGTCCTGCATTGGACCGACTCGCTGCCCAAG

ACACGATCTGGAAAGATCATGCGACGAATCCTGCGAAAGATCGCTGCCGGTGACAC  
CTCTAACCTGGGCGACACTTCTACCCTGGCTGACCCTGGCGTGGTTCGAGAAGCCCCT  
GGAAGAGAAGCAGGCCATTGCTATGCCCTCTTAA

>CILS

ATGTCCTCTTGCATCAACCCCTCTACTCTGGTGACCTCTGTGAACGCCTTCAAGTGTC  
TGCCCCTGGCCACCAACAAGGCCGCCATCCGAATCATGGCCAAGTACAAGCCCCTG  
CAGTGCCTGATCTCTGCCAAGTACGACAACCTGACCGTGGACCGACGATCTGCCAAC  
TACCAGCCTTCTATCTGGGACCACGACTTTCTGCAGTCTCTGAACTCTAACTACACC  
GACGAGGCCTACAAGCGACGAGCCGAGGAACTGCGAGGCAAGGTGAAGATCGCCA  
TCAAGGACGTGATCGAGCCCCTGGACCAGCTGGAACCTGATTGACAACCTGCAGCGA  
CTGGGACTCGCCACCGATTTCGAGACTGAGATCCGAAACATCCTGAACAACATCTAT  
AACAAACAACAAGGACTACAACCTGGCGAAAGGAAAACCTGTACGCCACCTCTCTCGA  
GTTCCGACTGCTGCGACAGCACGGCTACCCCGTGTCTCAAGAGGTGTTCAACGGCTT  
CAAGGACGACCAAGGCGGCTTCATCTGCGACGACTTCAAGGGCATCCTGTCTCTGCA  
CGAGGCCTCTTACTACTCGCTCGAGGGCGAGTCTATCATGGAAGAGGCCTGGCAGTT  
CACCTCTAAGCACCTGAAGGAAGTGATGATCTCTAAGAACATGGAAGAAGATGTGT  
TCGTCGCCGAGCAGGCCAAGCGAGCCCTGGAACCTGCCCTGCACTGGAAGGTGCC  
ATGCTCGAGGCCCGATGGTTCATCCACATCTACGAACGACGAGAGGACAAGAACCA  
CCTCCTGCTCGAGCTGGCCAAGATGGAATTCAACACCCTGCAGGCCATCTACCAAGA  
GGAACCTGAAGGAAATCTCTGGCTGGTGGAAAGGACACCGGCCTGGGCGAGAAGCTGT  
CTTTCGCCCGAAACCGACTGGTGGCCTCTTTCCTGTGGTCTATGGGAATCGCCTTCGA  
GCCCCAGTTCGCCTACTGCCGACGAGTGCTGACCATCTCTATCGCCCTGATCACCGT  
GATCGACGATATCTACGACGTGTACGGCACCCCTGGACGAGCTTGAGATTTTCACCGA  
CGCCGTGGAACGATGGGACATCAACTACGCCCTGAAGCACTTGCCCGGCTATATGA  
AGATGTGCTTCCCTGGCTCTGTACAACCTTCGTGAACGAGTTCGCTTACTACGTGCTGA  
AGCAGCAGGACTTCGACCTGCTGCTGTCTATCAAGAACGCCTGGCTGGGCCTGATCC  
AGGCCTACCTGGTCGAGGCCAAGTGGTATCACTCCAAGTACACCCCTAAGCTGGAA  
GAGTACCTCGAGAACGGCCTGGTGTCTATCACCGGACCTCTGATCATCACCATCTCT  
TACCTGTCTGGCACTAACCCCATCATCAAGAAGGAACTGGAATTCCTCGAGTCTAAC  
CCCGACATCGTGCCTGCTGCTCTAAGATCTTTCGACTGCAGGACGACCTGGGCACC  
TCTTCTGACGAGATCCAGCGAGGGCGACGTGCCCAAGTCTATCCAGTGCTACATGCAC  
GAGACTGGCGCCTCTGAGGAAGTGGCCCGACAGCACATTAAGGACATGATGCGACA  
GATGTGGAAGAAGGTCAACGCCTATACCGCCGACAAGGACTCTCCCCTGACCGGAA  
CCACCACCGAGTTTCTGCTGAACCTGGTGCGAATGTCTCACTTCATGTACCTGCACG  
GTGACGGCCACGGCGTGCAAAAACCAAGAGACTATCGACGTGGGCTTCACCCTGCTG  
TTCCAGCCTATTCTCTCGAGGACAAGCACATGGCCTTCACCGCTTCTCCCGGCACC  
AAGGGCTAA

>PfLS

ATGCACATGGCTATCCCCATCAAGCCCGCTCACTACCTGCACAACCTCTGGCCGATCT  
TACGCCTCTCAGCTGTGCGGCTTCTCTTCTACCTCTACTCGAGCCGCCATTGCTCGAC  
TGCCCCTGTGCCTGCGATTCCGATGCTCTCTGCAGGCCTCTGACCAGCGACGATCTG  
GCAACTACTCTCCCTCTTTCTGGAACGCCGACTACATCCTGTCTCTGAACTCTCACTA  
CAAGGACAAGTCTCACATGAAGCGAGCCGGCGAGCTGATCGTGCAGGTCAAGATGG  
TGATGGGCAAGGAAACTGACCCCGTCGTCCAGCTTGAGCTGATTGACGACCTGCAG  
AAGCTGGCCCTGTCTCACCACGTGAGAAAGGAAATCAAGGAAATTCTGTTCAAGAT  
CTCTACCTACGACCACAAGATCATGGTTCGAGCGAGATCTGTACTCTACCGCTCTGGC  
CTTCCGACTGCTGCGACAGTACGGCTTCAAGGTGCCCAAGAGGTGTTTCGACTGCTT  
CAAGAACGACAACGGCGAGTTCAAGCGATCTCTGTCTCTGACACCAAGGGCCTGC  
TGCAGCTGTACGAGGCTTCGTTCTCTGCTGACCGAGGGCGAGATGACCCTCGAGCTGG  
CCCGAGAGTTCGCCACCAAGTCTCTGCAAGAGAAGCTGAACGAAAAGACCATTGAC  
GACGACGATGACGCCGACACCAACCTGATCTCTTTCGCTGCGACACTCTCTGGACATC  
CCCATCCACTGGCGAATTCAGCGACCCAACGCCTCTTGGTGGATCGACGCCTACAAG  
CGAAGATCCACATGAACCCTCTGGTGTGGAACCTGGCTAAGCTGGACCTGAACAT  
CTTCCAGGCTCAGTTTCAGCAAGAGCTGAAGCAGGACCTCGGCTGGTGGAAAGAACA  
CCTGTCTGGCCGAGAAGCTGCCCTTCGTGCGAGATCGACTGGTTCGAGTGTACTTCT  
GGTGCACCGGCATCATTACGCCCTGCAGCACGAGAACGCCCGAGTGACCCTGGCC  
AAGGTGAACGCCCTGATCACCCTCTGGACGACATCTACGACGTGTACGGCACCCCTC  
GAGGAACTCGAGCTGTTACCCGAGGCCATCCGACGATGGGACGTGTCCTCTATCGA  
CCATCTGCCTAACTATATGCAGCTGTGCTTTCTGGCTCTGAACAACCTTCGTGGACGA  
CACCGCCTACGACGTCATGAAGGAAAAGGACATCAACATCATTCCCTACCTGCGAA  
AGTCTTGGCTGGACCTCGCCGAGACTTACCTGGTCGAGGCCAAGTGGTTCTACTCTG  
GACACAAGCCCAACCTGGAAGAGTACCTGAACAACGCCTGGATCTCTATCTCTGGC  
CCCGTGATGCTGTGCCACGTGTTCTTTCGAGTGACCGACTCTATCACCCGAGAGACT  
GTCGAGTCCCTGTTCAAGTACCACGACCTGATCCGATACTCCTCTACCATCCTGCGA  
CTGGCCGACGACCTGGGCACCTCTCTGGAAGAGGTGTCCCGAGGGCGACGTGCCCAA  
GTCTATCCAGTGCTACATGAACGATAACAACGCTTCTGAGGAAGAGGCCCGACGAC  
ACATCCGATGGCTGATCGCTGAGACTTGGGAAGAAGATCAACGAAGAGGTCTGGTCT  
GTGGACTCGCCCTTCTGCAAGGACTTCATTGCCTGTGCCGCCGACATGGGCCGAATG  
GCCAGTTCATGTACCACAACGGTGACGGCCACGGCATTCAAGAACCCTCAGATCCA  
CCAGCAGATGACCGACATCCTGTTTCGAGCAGTGGCTGTAA

>AaBFS

ATGTCTACCCTGCCTATCTCTTCTGTGTCTCTCGTCTTCGTCTACCTCTCCTATCGTGGT  
GGACGACAAGGACTCTACCAAGCCTGACGTGATCCGACACACCACCAACTTCAACG  
CCTCTATCTGGGGCGACCAGTTCCTGACCTACGACGAGCCCGAGGACCTGGTGTATGA  
AGAAGCAGCTGGTCGAGGAACTGAAGGAAGAGGTCAAGAAGGAACTGATCACCAT  
CAAGGGCTCTAACGAGCCCATGCAGCACGTGAAGCTGATCGAGCTGATTGACGCCG  
TGCAGCGACTGGGAATCGCCTACCACTTCGAGGAAGAGATCGAGGAAGCTCTGCAG  
CACATCCACGTCACCTACGGCGAGCAGTGGGTCGACAAGGAAAACCTGCAGTCTAT  
CTCCCTGTGGTTCCGACTGCTGCGACAGCAGGGCTTCAACGTGTCCTCTGGCGTGTT  
CAAGGACTTCATGGACGAGAAGGGCAAGTTCAAGGAATCTCTGTGCAACGACGCC

AGGGCATTCTGGCCCTGTACGAGGCCGCCTTCATGCGAGTCGAGGACGAGACTATC  
CTGGACAACGCCCTCGAGTTCTCTAAGGTCCACCTGGACATCATTGCTAAGGACCCC  
TCTTGCGACTCTTCGCTGCGAACCCAGATCCACCAGGCTCTGAAGCAGCCCCTGCGA  
CGACGACTGGCCCGAATCGAGGCCCTGCACTACATGCCCATCTACCAGCAAGAGAC  
TTCTCACGACGAGGTGCTGCTGAAGCTGGCCAAGCTGGACTTCTCCGTGCTGCAGTC  
CATGCACAAGAAGGAATTGTCTCACATCTGCAAGTGGTGGAAAGGACCTGGACCTGC  
AGAACAAGCTGCCCTTCGTCCGAGATCGAGTGGTCGAGGGCTACTTCTGGATCCTGT  
CTATCTACTACGAGCCCCAGCACGCTCGAACCCGAATGTTCCCTGATGAAGTCTTGCA  
TGTGGCTGGTGGTGGTGGACGACACCTTCGACAACCTACGGCACCTACGAGGAACTC  
GAGATCTTCACCCAGGCCGTCGAGAAGTGGTCTATCTCTTGCCTGGACATGCTGCC  
GAGTACATGAAGCTCATCTACCAAGAGCTGGTGAACCTGCACGTCGAGATGGAAGA  
GTCTCTCGAGAAGGAAGGCAAGGCCTACCAGATTCCTACTACGTGAAGGAAATGGCCA  
AGGAACTCGTGCGAAACTACCTGGTTGAGGCCCGATGGCTCAAGGAAGGCTACATG  
CCTACTCTGGAAGAGTACATGTCTGTGTCTATGGTGACCGGAACCTACGGCCTGATG  
ACCGCTCGATCTTACGTCCGCCGAGGCCGACATCGTGAACGAGGACACCTTCAAGTG  
GGTGTGCTCTTACCCTCCAATTGTGAAGGCCTCTTGCGTGATCATCCGACTGATGGA  
CGACATTGTGTCTCACAAGGAAGAACAAGAGCGAGGCCACGTCGCCTCTTCTATCG  
AGTGCTACTCTAAGGAATCTGGCGCCTCTGAGGAAGAGGCCTGCGAGTACATCTCTC  
GAAAGGTTGAGGACGCCTGGAAGGTGATCAACCGAGAGTCTCTGCGACCCACCGCT  
GTGCCCTTCCACTGCTGATGCCCGCCATCAACCTGGCTCGAATGTGTGAGGTGCTG  
TACTCCGTGAACGACGGCTTCACCCACGCTGAGGGCGACATGAAGAGTTACATGAA  
GTCGTTCTTCGTGCACCCCATGGTGGTGTAA

>CnVS

ATGGCCGAGATGTTCAACGGCAACTCTTCTAACGACGGATCTTCTTGCATGCCCGTG  
AAGGACGCCCTGCGACGAACCGGCAACCACCATCCTAACCTGTGGACCGACGACTT  
CATCCAGTCTCTGAACTCTCCCTACTCTGACTCTTCTTACCACAAGCACCGAGAGAT  
CCTGATCGACGAGATCCGAGACATGTTCTTAACGGCGAGGGCGACGAGTTCGGCG  
TGCTCGAGAACATCTGGTTCGTGGACGTGGTGCAGCGACTGGGCATCGACCGACACT  
TCCAAGAGGAAATCAAGACCGCTCTGGACTACATCTACAAGTTCTGGAACCACGAC  
TCTATCTTCGGCGACCTGAACATGGTGGCCCTGGGCTTCCGAATCCTGCGACTCAAC  
CGATACGTGGCCTCTTCTGACGTGTTCAAGAAGTTCAAGGGCGAAGAGGGCCAGTTC  
TCTGGCTTCGAGTCCTCTGACCAGGACGCCAAGCTCGAGATGATGCTGAACCTGTAC  
AAGGCCTCTGAGCTGGACTTCCCCGACGAGGACATCCTGAAGGAAGCCCGAGCCTT  
CGCCTCTATGTACCTGAAGCACGTGATCAAGGAATACGGCGACATCCAAGAGTCTA  
AGAACCCTCTGCTGATGGAAATCGAGTACACCTTCAAGTACCCCTGGCGGTGTCGAC  
TGCCCCGACTCGAGGCCTGGAACCTTCAATTCACATCATGCGACAGCAGGACTGCAAC  
ATCTCTCTGGCCAACAACCTCTACAAGATCCCCAAGATCTACATGAAGAAGATTCTC  
GAGCTGGCCATCCTGGACTTCAACATCCTGCAGTCTCAGCACCAGCACGAGATGAA  
GCTCATTCTACCTGGTGGAAAGAACTCTTCTGCTATCCAGCTCGACTTCTTCCGACAC  
CGACACATCGAGTCTTACTTTTGGTGGGCTTCGCCCTGTTTCGAGCCCGAGTTCTCTA  
CCTGCCGAATCAACTGCACCAAGCTGTCTACCAAGATGTTCCCTGCTCGACGACATCT  
ACGACACCTACGGCACCGTCGAGGAACTGAAGCCCTTCACCACCACTCTGACCCGA

TGGGACGTGTCTACCGTGGACAACCATCCTGACTATATGAAGATCGCCTTCAACTTC  
TCTTACGAGATCTACAAGGAAATCGCCTCTGAGGCCGAGCGAAAGCACGGCCCCTT  
CGTGTACAAGTACCTGCAGTCGTGCTGGAAGTCTTACATCGAGGCCTACATGCAAGA  
GGCCGAGTGGATCGCCTCTAACCACATTCTGGATTTCGACGAGTACCTGATGAACGG  
CGTGAAGTCCTCTGGCATGCGAATCCTGATGATTCACGCCCTGATCCTGATGGACAC  
CCCTCTGTCTGACGAGATTCTGGAACAGCTGGACATCCCTTCGTCTAAGTCTCAGGC  
CCTGCTGTCTCTGATCACCCGACTGGTGGACGACGTCAAGGACTTCGAGGACGAGC  
AGGCCACGGCGAGATGGCCTCGTCTATCGAGTGTTACATGAAGGACAACCACGGC  
TCTACCCGAGAGGACGCTCTGAACTACCTGAAGATCCGAATCGAGTCCTGCGTGCA  
AGAGCTGAACAAGGAAGTCTCGAGCCCTCTAACATGCACGGATCTTTCCGAAACC  
TGTACCTCAACGTGGGAATGCGAGTGATTTTCTTCATGCTGAACGACGGTGACCTGT  
TCACCCACTCTAACCGAAAGGAAATCCAGGACGCTATACCAAGTTCTTCGTGAGC  
CCATCATTCCTAA

>XdCtrl

ATGGGAAAAGAACAAGATCAGGATAAACCCACAGCTATCATCGTGGGATGTGGTAT  
CGGTGGAATCGCCACTGCCGCTCGTCTTGCTAAAGAAGGTTTCCAGGTCACGGTGTT  
CGAGAAGAACGACTACTCCGGAGGTCGATGCTCTTTAATCGAGCGAGATGGTTATC  
GATTCGATCAGGGGCCAGTTTGCTGCTCTTGCCAGATCTCTTCAAGCAGACATTCG  
AAGATTTGGGGGAGAAGATGGAAGATTGGGTTCGATCTCATCAAGTGTGAACCCAAC  
TATGTTTGCCACTTCCACGATGAAGAGACTTTCACTTTTTCAACCGACATGGCGTTGC  
TCAAGCGGGAAGTCGAGCGTTTTGAAGGCAAAGATGGATTTGATCGGTTCTTGTCGT  
TTATCCAAGAAGCCCACAGACATTACGAGCTTGCTGTCGTTACAGTCCTGCAGAAGA  
ACTTCCCTGGCTTCGCAGCATTCTTACGGCTACAGTTCATTGGCCAAATCCTGGCTCT  
TCACCCCTTCGAGTCTATCTGGACAAGAGTTTGTCGATATTTCAAGACCGACAGATT  
ACGAAGAGTCTTCTCGTTTGCAGTGATGTACATGGGTCAAAGCCCATAACAGTGCGCC  
CGGAACATATTCCTTGCTCCAATACACCGAATTGACCGAGGGCATCTGGTATCCGAG  
AGGAGGCTTTTGGCAGGTTCCCTAATACTCTTCTTCAGATCGTCAAGCGCAACAATCC  
CTCAGCCAAGTTCAATTTCAACGCTCCAGTTTCCCAGGTTCTTCTCTCCTGCCAAG  
GACCGAGCGACTGGTGTTCGACTTGAATCCGGCGAGGAACATCACGCCGATGTTGT  
GATTGTCAATGCTGACCTCGTTTACGCCTCCGAGCACTTGATTCTGACGATGCCAG  
AAACAAGATTGGCCAACCTGGGTGAAGTCAAGAGAAGTTGGTGGGCTGACTTAGTTG  
GTGGAAAGAAGCTCAAGGGAAGTTGCAGTAGTTTGAGCTTCTACTGGAGCATGGAC  
CGAATCGTGGACGGTCTGGGCGGACACAATATCTTCTTGGCCGAGGACTTCAAGGG  
ATCATTCGACACAATCTTCGAGGAGTTGGGTCTCCCAGCCGATCCTTCCTTTACGTG  
AACGTTCCCTCGGAATCGATCCTTCTGCCGCTCCCGAAGGCAAAGATGCTATCGTC  
ATTCTTGTGCCGTGTGGCCATATCGACGCTTCGAACCCTCAAGATTACAACAAGCTT  
GTTGCTCGGGCAAGGAAGTTTGTGATCCAAACGCTTTCCGCCAAGCTTGGACTTCCC  
GACTTTGAAAAAATGATTGTGGCAGAGAAGGTTACGATGCTCCCTCTTGGGAGAA  
AGAATTTAACCTCAAGGACGGAAGCATCTTGGGACTGGCTCACAACCTTTATGCAAGT  
TCTTGGTTTCAGGCCGAGCACCAGACATCCCAAGTATGACAAGTTGTTCTTTGTGCGG  
GGCTTCGACTCATCCCGAACTGGGGTTCCCATCGTCTTGGCTGGAGCCAAGTTAAC  
TGCCAACCAAGTTCTCGAATCCTTTGACCGATCCCAGCTCCAGATCCCAATATGTC

ACTCTCCGTACCATATGGAAAACCTCTCAAATCAAATGGAACGGGTATCGATTCTCA  
GGTCCAGCTGAAGTTCATGGATTTGGAGAGATGGGTATACCTTTTGGTGTTGTTGAT  
TGGGGCCGTGATCGCTCGATCCGTTGGTGTCTTGCTTTCTGA

>XdCtrYB

ATGACGGCTCTCGCATATTACCAGATCCATCTGATCTATACTCTCCCAATTCTTGGTC  
TTCTCGGCCTGCTCACTTCCCCGATTTTGACAAAATTTGACATCTACAAAATATCGAT  
CCTCGTATTTATTGCGTTTtagTGCAACCACACCATGGGACTCATGGATCATCAGAAA  
TGCGCATGGACATATCCATCAGCGGAGAGTGGCCAAGGCGTGTTTGGAACGTTTCT  
AGATGTTCCATATGAAGAGTACGCTTTCTTTGTCATTCAAACCGTAATCACCGGCTT  
GGTCTACGTCTTGGCAACTAGGCACCTTCTCCCATCTCTCGCGCTTCCAAGACTAG  
ATCGTCCGCCCTTTCTCTCGCGCTCAAGGCGCTCATCCCTCTGCCATTATCTACCTA  
TTTACCGCTCACCCAGCCCATCGCCCGACCCGCTCGTGACAGATCACTACTTCTAC  
ATGCGGGCACTCTCCTTACTCATCACCCACCTACCATGCTCTTGGCAGCATTATCA  
GGCGAATATGCTTTCGATTGGAAAAGTGGCCGAGCAAAGTCAACTATTGCAACAAT  
CATGATCCCGACGGTGTATCTGATTTGGGTAGATTATGTTGCTGTCGGTCAAGACTC  
TTGGTTCGATCAACGATGAGAAGATTGTAGGGTGGAGGCTTGGAGGTGTACTACCCA  
TTGAGGAAGCTATGTTCTTCTTACTGACGAATCTAATGATTGTTCTGGGTCTGTCTGC  
CTGCGATCATACTCAGGCCCTATACCTGCTACACGGTCGAACTATTTATGGCAACAA  
AAAGATGCCATCTTCATTTCCCTCATTACACCGCCTGTGCTCTCCCTGTTTTTTAGC  
AGCCGACCATACTCTTCTCAGCCAAAACGTGACTTGGAACTGGCAGTCAAGTTGTTG  
GAGGAAAAGAGCCGGAGCTTTTTTGTGCTCGGCTGGATTTCTAGCGAAGTTAGG  
GAGAGGCTGGTTGGACTATACGCATTCTGCCGGGTGACTGATGATCTTATCGACTCT  
CCTGAAGTATCTTCCAACCCGCATGCCACAATTGACATGGTCTCCGATTTTCTTACCC  
TACTATTTGGGCCCCCGCTACACCCTTCGCAACCTGACAAGATCCTTTCTTCGCCTTT  
ACTTCCCTCCTTCGCACCCTTCCCGACCCACGGGAATGTATCCCTCCCGCCTCCTCCT  
TCGCTCTCGCCTGCCGAGCTCGTTCAATTCCTTACCGAAAGGGTTCCCGTTCAATACC  
ATTTTCGCCTTCAGGTTGCTCGCTAAGTTGCAAGGGCTGATCCCTCGATACCCACTCG  
ACGAACTCCTTAGAGGATACACCACTGATCTTATCTTTCCCTTATCGACAGAGGCAG  
TCCAGGCTCGGAAGACGCCTATCGAGACCACAGCTGACTTGCTGGACTATGGTCTAT  
GTGTAGCAGGCTCAGTCGCCGAGCTATTGGTCTATGTCTCTTGGGCAAGTGCACCAA  
GTCAGGTCCCTGCCACCATAGAAGAAAGAGAAGCTGTGTTAGTGGCAAGCCGAGAG  
ATGGGAACTGCCCTTCAGTTGGTGAACATTGCTAGGGACATTAAGGGGACGCAAC  
AGAAGGGAGATTTTACCTACCACTCTCATTCTTTGGTCTTCGGGATGAATCAAAGCT  
TGCGATCCCGACTGATTGGACGGAACCTCGGCCTCAAGATTTGACAAACTCCTCAG  
TCTATCTCCTTCGTCCACATTACCATCTTCAAACGCCTCAGAAAGCTTCCGGTTCGAA  
TGGAAGACGTACTCGCTTCCATTAGTCGCCTACGCAGAGGATCTTGCCAAACATTCT  
TATAAGGGAATTGACCGACTTCTACCGAGGTTCAAGCGGGAATGCGAGCGGCTTG  
CGCGAGCTACCTACTGATCGGCCGAGAGATCAAAGTCGTTTGGAAAGGAGACGTCG  
GAGAGAGAAGGACAGTTGCCGGATGGAGGAGAGTACGGAAAGTCTTGAGTGTGGTC  
ATGAGCGGATGGGAAGGGCAGTAA

## References:

- Angerer, H., Radermacher, M., Ma kowska, M., Steger, M., Zwicker, K., Heide, H., et al. (2014). The LYR protein subunit NB4M/NDUFA6 of mitochondrial complex I anchors an acyl carrier protein and is essential for catalytic activity. *Proc. Natl. Acad. Sci.* 111, 5207–5212. doi:10.1073/pnas.1322438111.
- Holkenbrink, C., Dam, M. I., Kildegaard, K. R., Beder, J., Dahlin, J., Doménech Belda, D., et al. (2018). EasyCloneYALI: CRISPR/Cas9-Based Synthetic Toolbox for Engineering of the Yeast *Yarrowia lipolytica*. *Biotechnol. J.* 13, 1700543. doi:10.1002/biot.201700543.
- Kildegaard, K. R., Adiego-Pérez, B., Doménech Belda, D., Khangura, J. K., Holkenbrink, C., and Borodina, I. (2017). Engineering of *Yarrowia lipolytica* for production of astaxanthin. *Synth. Syst. Biotechnol.* 2, 287–294. doi:10.1016/j.synbio.2017.10.002.
- Marella, E. R., Dahlin, J., Dam, M. I., ter Horst, J., Christensen, H. B., Sudarsan, S., et al. (2019). A single-host fermentation process for the production of flavor lactones from non-hydroxylated fatty acids. *Metab. Eng.*, 0–1. doi:10.1016/j.ymben.2019.08.009.
